# Supplementary material for: Assembly and Interrogation of Alzheimer’s Disease Genetic Networks Reveal Novel Regulators of Progression
Source: PubMed Central journal article supplement (PMC4363671; doi:10.1371/journal.pone.0120352), 2015-03-17

A.

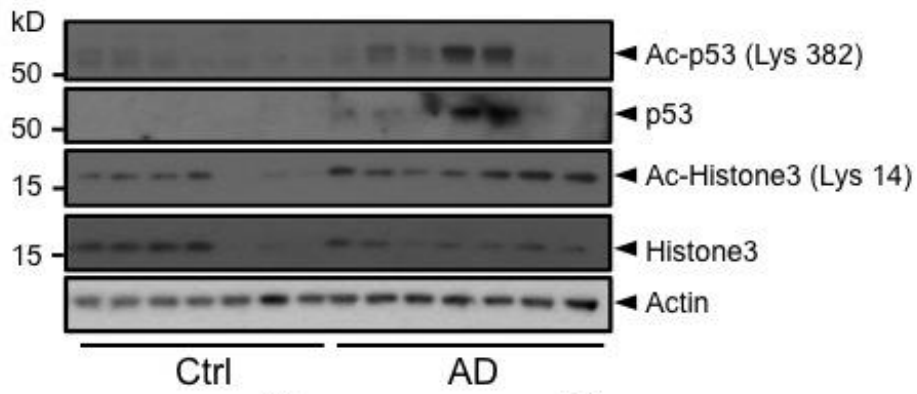

B.

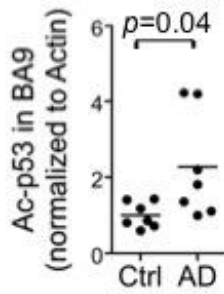

C.

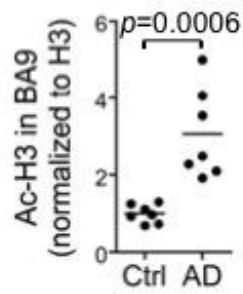

D.

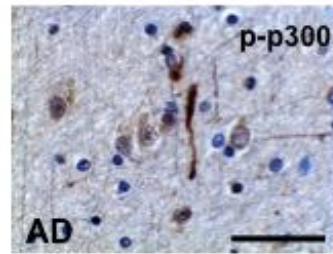

Supplement: pone.0120352.s006.pdf [file pone.0120352.s006.pdf]
