# Supplementary material for: Assembly and Interrogation of Alzheimer’s Disease Genetic Networks Reveal Novel Regulators of Progression
Source: PubMed Central journal article supplement (PMC4363671; doi:10.1371/journal.pone.0120352), 2015-03-17
Supplement: pone.0120352.s009.pdf [file pone.0120352.s009.pdf]

| Gene Name               | Probe Number | NES    | Odds Ratio | Additional Regions     |
|-------------------------|--------------|--------|------------|------------------------|
| Control versus Affected |              |        |            |                        |
| CITED1                  | 207144_s_at  | -1.806 | 69.084     | MTG, SFG               |
| ZXDC                    | 234991_at    | 1.936  | 46.381     | MTG                    |
| MITF                    | 226066_at    | 1.994  | 44.162     | MTG                    |
| TCFL5                   | 235694_at    | 1.88   | 43.164     | MTG                    |
| VEZF1                   | 202173_s_at  | 1.937  | 39.933     | MTG                    |
| ZFHX3                   | 226137_at    | 1.908  | 33.487     | MTG, SFG               |
| TSC22D2                 | 204094_s_at  | 1.907  | 30.891     | HIP, MTG               |
| LEF1                    | 221558_s_at  | 1.917  | 29.768     | SFG                    |
| ZCCHC24                 | 212423_at    | 1.847  | 26.856     | MTG, SFG               |
| BBX                     | 213015_at    | 1.918  | 25.219     | HIP, MTG, SFG          |
| CREBBP                  | 202160_at    | 1.92   | 22.095     | MTG, SFG               |
| HES6                    | 226446_at    | 1.891  | 21.327     | MTG                    |
| RORA                    | 235567_at    | 1.882  | 20.527     | HIP, MTG               |
| ZBTB20                  | 222357_at    | 1.891  | 17.512     | MTG, SFG               |
| PHF21B                  | 1562309_s_at | 2.212  | 17.432     | SFG                    |
| TRPS1                   | 222651_s_at  | 1.91   | 16.189     | MTG                    |
| ETS1                    | 224833_at    | 1.894  | 14.628     | MTG                    |
| NDAD versus Affected    |              |        |            |                        |
| SOX9                    | 202935_s_at  | 1.829  | 112.6      | MTG, SFG, VCX          |
| ELF1                    | 212420_at    | 1.698  | 97.189     | MTG, SFG               |
| BAZ1B                   | 213336_at    | 1.757  | 96.964     | HIP                    |
| TSC22D4                 | 208104_s_at  | 1.907  | 85.418     | HIP, MTG, SFG          |
| HES1                    | 203394_s_at  | 1.929  | 80.666     | HIP, MTG, SFG, VCX     |
| SOX10                   | 209842_at    | 1.826  | 77.052     | PC, MTG, SFG, VCX      |
| USF2                    | 214879_x_at  | 1.802  | 73.327     | HIP, SFG, VCX          |
| ZBTB24                  | 205340_at    | -1.732 | 70.819     | MTG                    |
| ZDHHC21                 | 235068_at    | -1.776 | 70.288     | VCX                    |
| ZNF358                  | 219379_x_at  | 1.775  | 69.593     | HIP, PC, MTG, SFG, VCX |
| NFIA                    | 226806_s_at  | 1.806  | 63.533     | HIP, MTG, SFG, VCX     |
| USF2                    | 202152_x_at  | 1.875  | 63.317     | HIP, SFG, VCX          |
| GLI2                    | 228537_at    | 1.744  | 62.957     | SFG                    |
| LMO4                    | 227155_at    | -1.723 | 60.375     | SFG                    |
| ZNF529                  | 231940_at    | -1.736 | 59.04      | MTG, VCX               |
| TFE3                    | 206649_s_at  | 1.843  | 57.891     | MTG, SFG               |
| NFIA                    | 224970_at    | 1.793  | 48.378     | HIP, MTG, SFG, VCX     |
| ATOH8                   | 228890_at    | 1.716  | 47.569     | MTG, SFG               |
| KLF15                   | 231015_at    | 1.675  | 45.079     | MTG, SFG               |
| ZFYVE20                 | 1553569_at   | 1.785  | 44.878     | SFG, VCX               |
| ZNF623                  | 206188_at    | -1.734 | 44.422     | MTG, VCX               |
| HDGF                    | 216484_x_at  | 1.764  | 43.532     | HIP, SFG, VCX          |
| ZFHX3                   | 242738_s_at  | 1.727  | 43.425     | SFG                    |
| ZFYVE20                 | 1553570_x_at | 1.831  | 43.339     | HIP, MTG, SFG, VCX     |
| ZCCHC24                 | 212423_at    | 1.788  | 42.234     | MTG, SFG               |

|         |              |        |        |                    |
|---------|--------------|--------|--------|--------------------|
| RXRA    | 202449_s_at  | 1.698  | 41.54  | MTG, SFG, VCX      |
| FOXO4   | 205451_at    | 1.664  | 41.137 | PC                 |
| LMO7    | 202674_s_at  | -1.734 | 40.757 | MTG, SFG, VCX      |
| MITF    | 207233_s_at  | 1.928  | 40.364 | MTG, SFG, VCX      |
| MECOM   | 221884_at    | 1.748  | 39.747 | MTG, SFG, VCX      |
| NKX2-2  | 206915_at    | 1.775  | 39.689 | MTG, SFG           |
| HIF3A   | 219319_at    | 1.709  | 39.466 | HIP, MTG, SFG, VCX |
| MTF2    | 203347_s_at  | -1.798 | 38.725 | MTG                |
| ZC3H14  | 213063_at    | -1.705 | 38.678 | PC                 |
| HIF3A   | 1556069_s_at | 1.717  | 38.408 | MTG, SFG           |
| ZNF711  | 228988_at    | -1.704 | 36.259 | MTG, SFG, VCX      |
| ZCCHC24 | 212419_at    | 1.733  | 35.595 | MTG, SFG, VCX      |
| SIX5    | 229009_at    | 1.713  | 35.008 | HIP, SFG, VCX      |
| ARID5A  | 213138_at    | 1.683  | 34.589 | PC                 |
| HIF3A   | 232669_at    | 1.751  | 34.148 | MTG, SFG           |
| ZMYM6   | 227594_at    | -1.675 | 33.508 | HIP                |
| BLZF1   | 203840_at    | -1.73  | 33.144 | MTG, VCX           |
| HEY2    | 222921_s_at  | 1.731  | 31.673 | HIP, MTG, SFG      |
| ZFP36L1 | 211962_s_at  | 1.718  | 30.895 | MTG, SFG, VCX      |
| SOX15   | 217040_x_at  | 1.627  | 29.994 | PC                 |
| ZNF382  | 1557260_a_at | -1.697 | 27.925 | MTG, SFG, VCX      |
| PPARA   | 244689_at    | 1.827  | 24.531 | MTG                |
| SATB2   | 213435_at    | -1.723 | 22.147 | PC, SFG            |
| GATA2   | 209710_at    | 1.683  | 21.934 | MTG, SFG           |
| TCF7L2  | 212762_s_at  | 1.796  | 20.504 | PC, MTG, SFG, VCX  |
| HDGF    | 200896_x_at  | 1.793  | 19.315 | HIP, MTG, SFG, VCX |
| UBTF    | 225982_at    | 1.675  | 17.725 | MTG                |
| ZBTB20  | 222357_at    | 1.765  | 14.97  | MTG, SFG           |
| TBX2    | 40560_at     | 1.764  | 14.411 | SFG                |
| CUX1    | 202367_at    | 1.913  | 13.41  | SFG                |
| ZBTB20  | 205383_s_at  | 1.812  | 10.925 | MTG, SFG, VCX      |

Control versus NDAD

|        |             |        |        |                        |
|--------|-------------|--------|--------|------------------------|
| HMBOX1 | 219269_at   | -1.823 | 73.231 | HIP                    |
| MEF2A  | 214684_at   | 1.764  | 71.763 | HIP, MTG               |
| ZMYM2  | 202778_s_at | 1.769  | 57.292 | VCX                    |
| ZNF720 | 238510_at   | 1.711  | 43.792 | PC, MTG                |
| ZNF281 | 228785_at   | 1.66   | 42.511 | MTG                    |
| ZMYM3  | 1554171_at  | 1.777  | 37.544 | HIP, PC, MTG, SFG, VCX |
| ZFHX4  | 219779_at   | -1.902 | 33.871 | PC, VCX                |
| LHX2   | 211219_s_at | -1.82  | 33.328 | HIP                    |
| BUD31  | 215815_at   | -1.602 | 32.385 | MTG                    |
| SOX2   | 213721_at   | -1.839 | 23.11  | HIP, PC                |
| RBPJ   | 211974_x_at | -1.808 | 22.083 | HIP, PC, MTG, VCX      |
| CTBP1  | 213980_s_at | 1.777  | 21.756 | HIP, PC                |
| MEF2D  | 225641_at   | 1.986  | 13.687 | HIP, PC, MTG, VCX      |

---

---

MR master regulator, NES normalized enrichment score, EC entorhinal cortex, AD Alzheimer's disease, NDAD non-demented Alzheimer's disease
